# Supplementary material for: Reliability of Optical Coherence Tomography Angiography Retinal Blood Flow Analyses
Source: PubMed Central journal article supplement — Transl Vis Sci Technol. 2023 Jul 3;12(7):3. doi: 10.1167/tvst.12.7.3 (PMC10324418; doi:10.1167/tvst.12.7.3), 2023-07-03

Table S1a. OD SVP scatter plots to show the relationship between analysis metrics with corresponding r values.

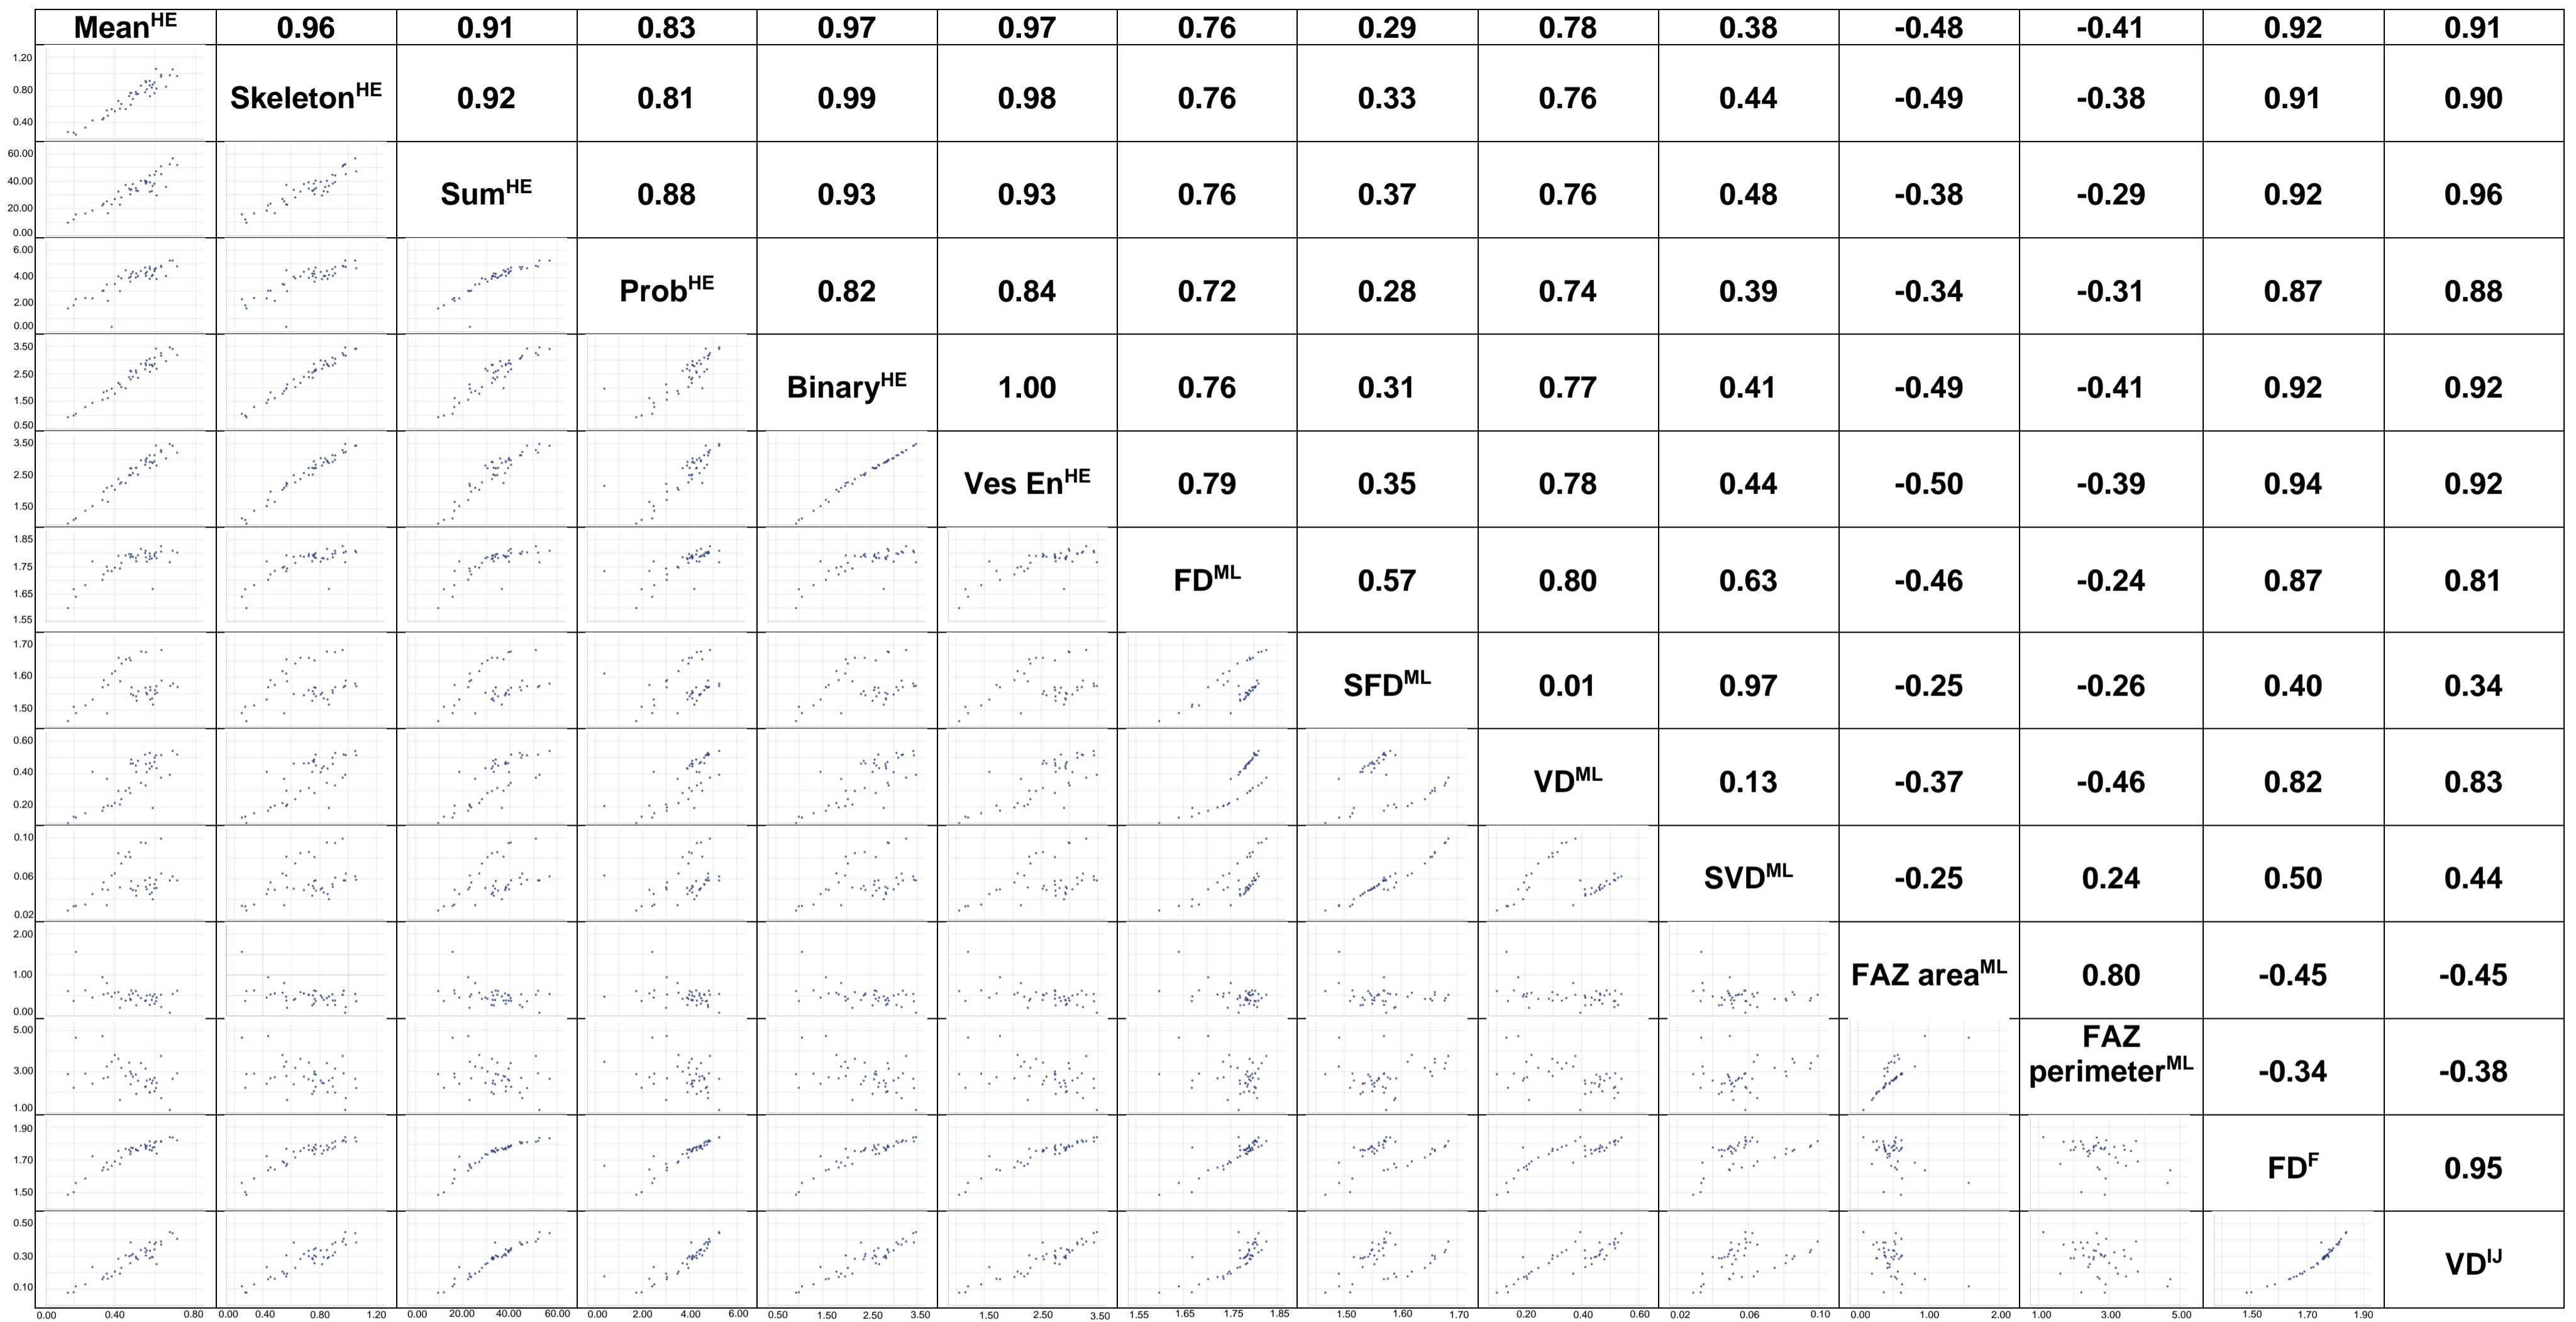

Table S1b. OD ICP scatter plots to show the relationship between analysis metrics with corresponding r values.

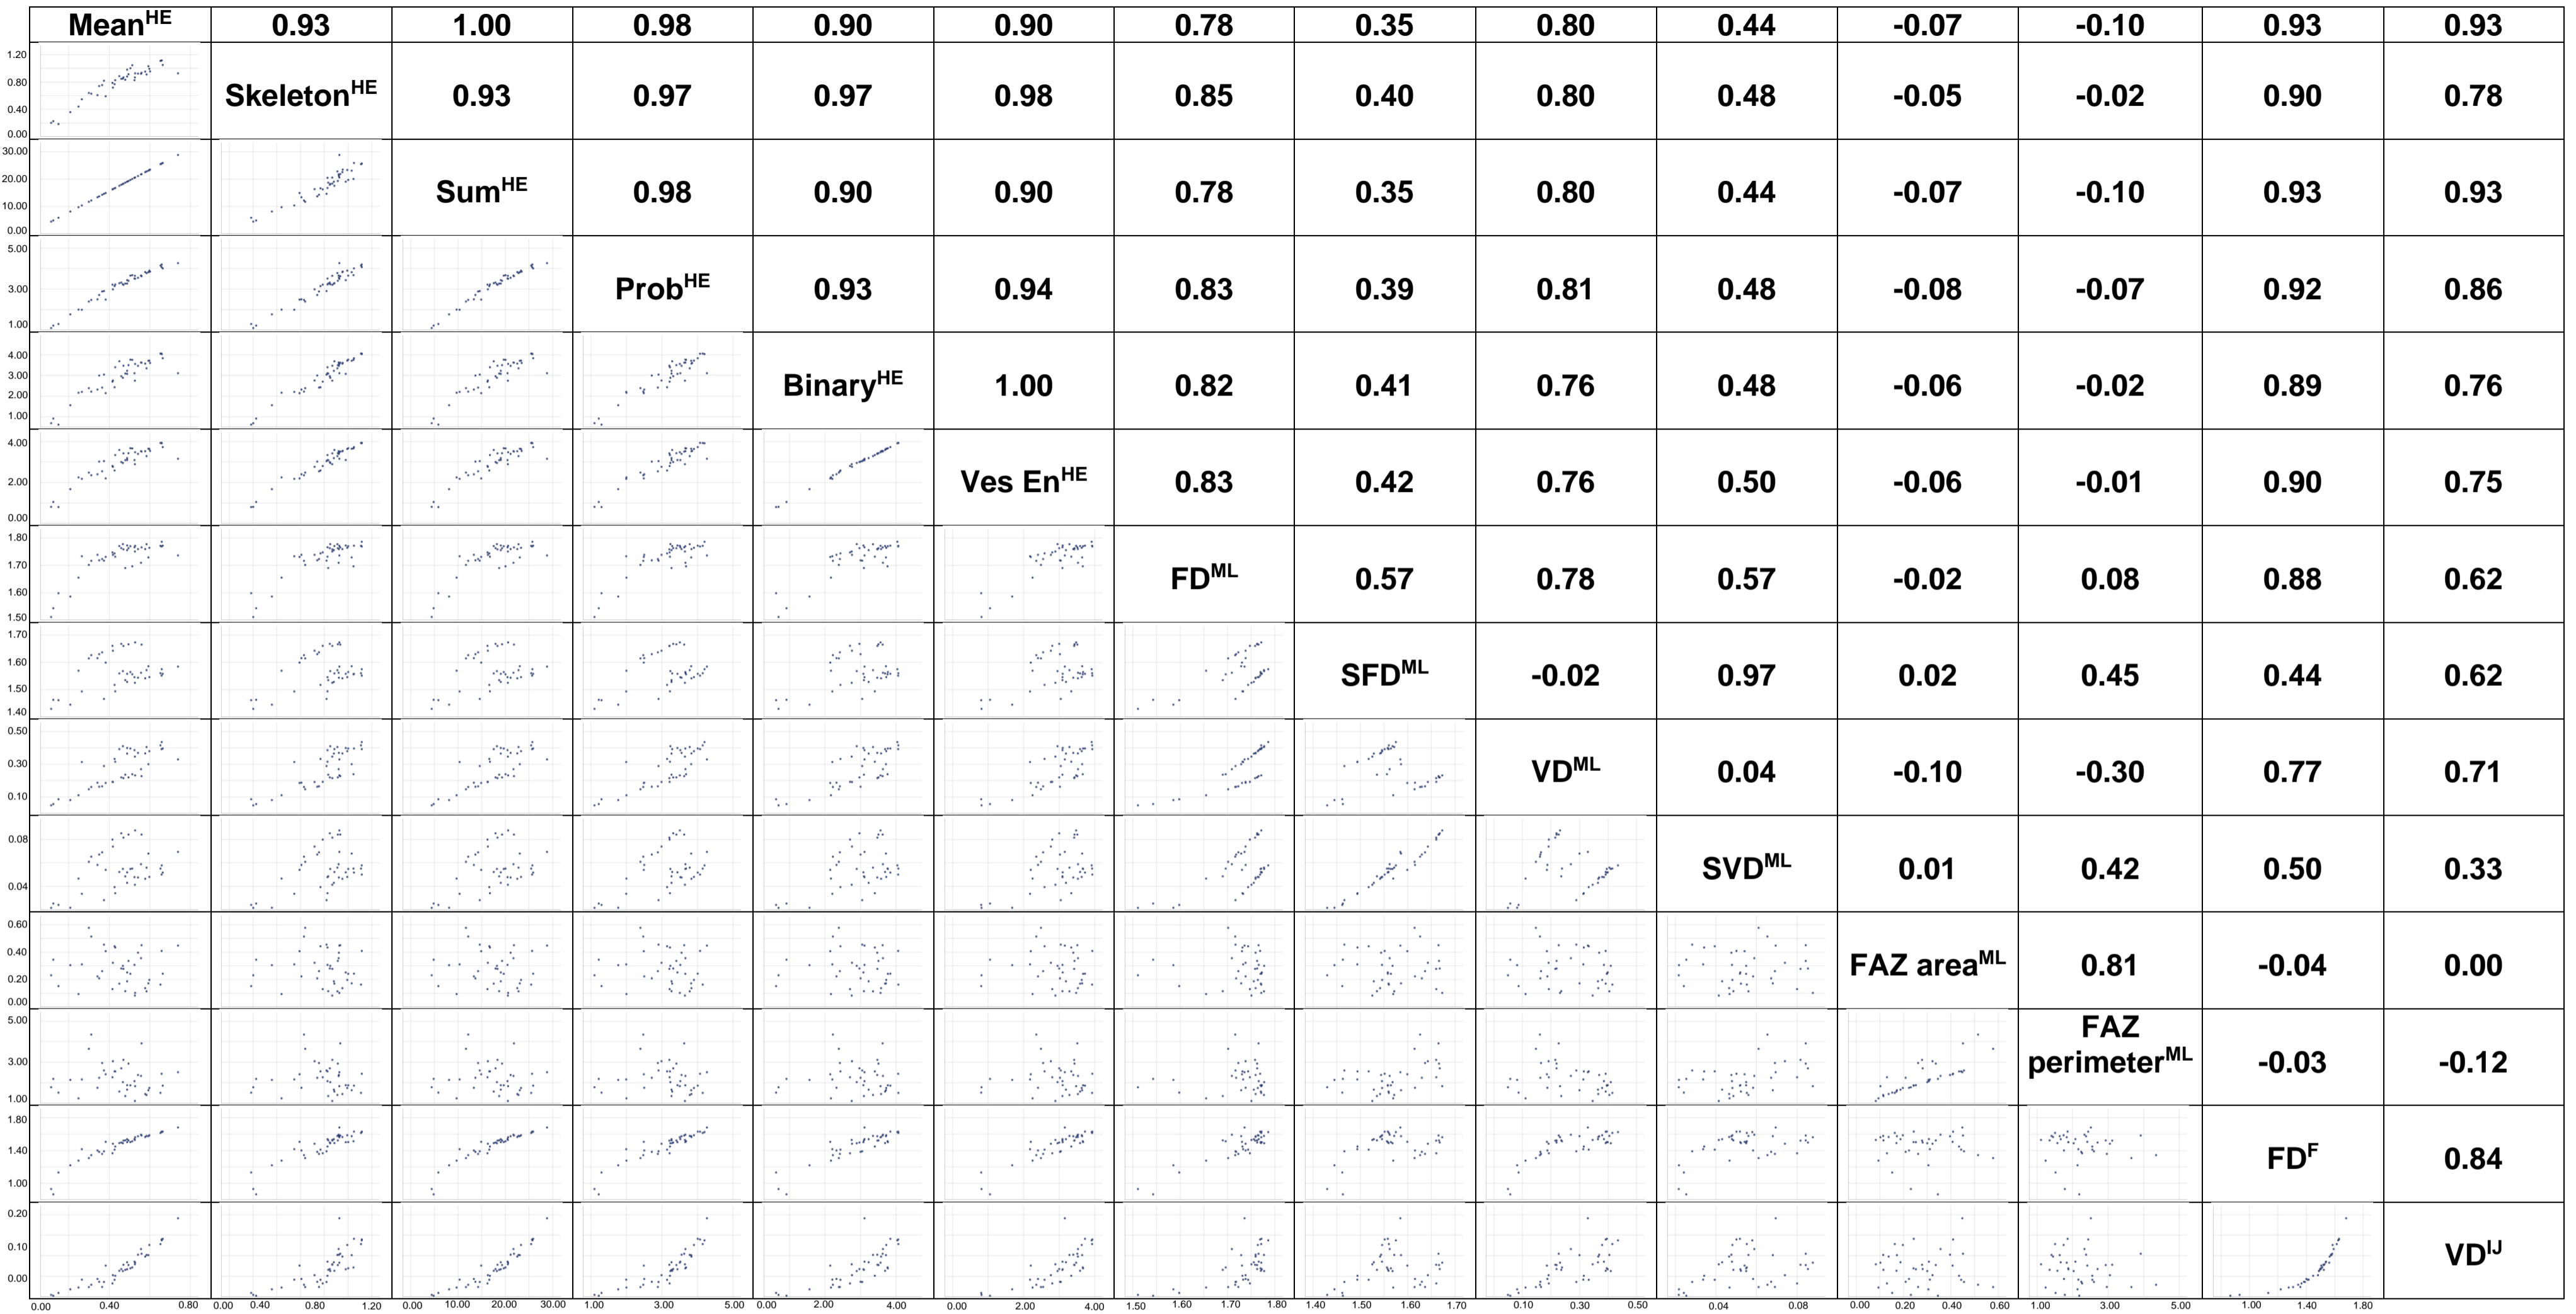

**Table S1c. OS SVP scatter plots to show the relationship between analysis metrics with corresponding r values.**

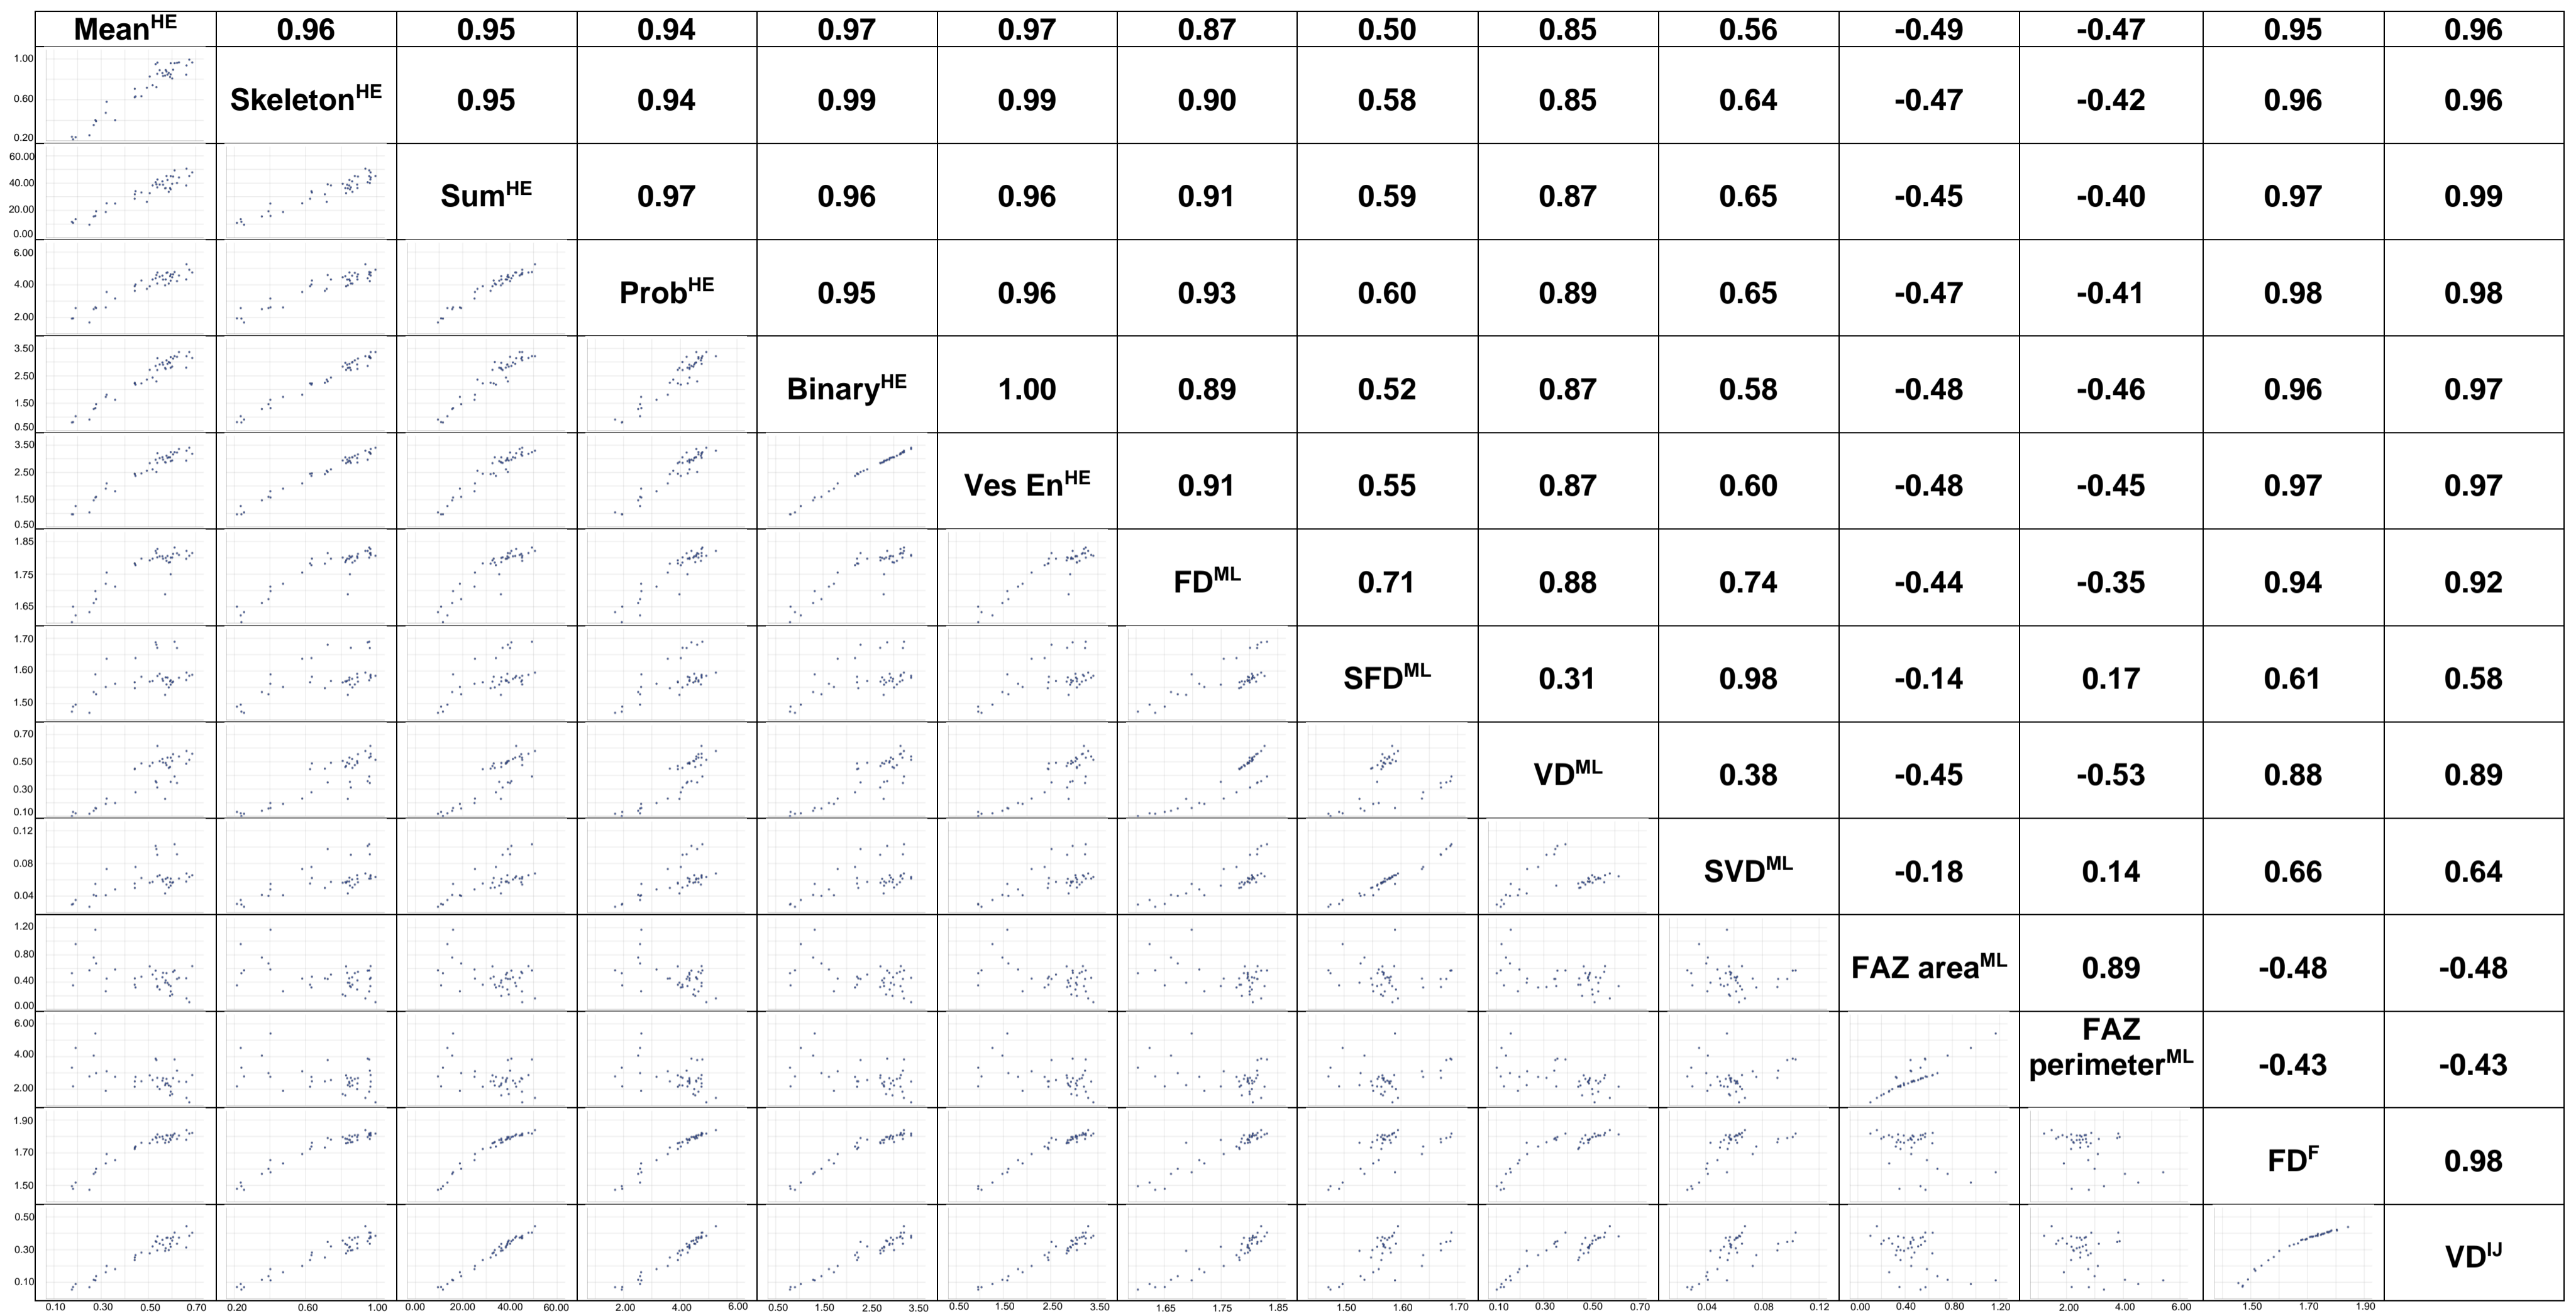

Table S1d. OS ICP scatter plots to show the relationship between analysis metrics with corresponding r values.

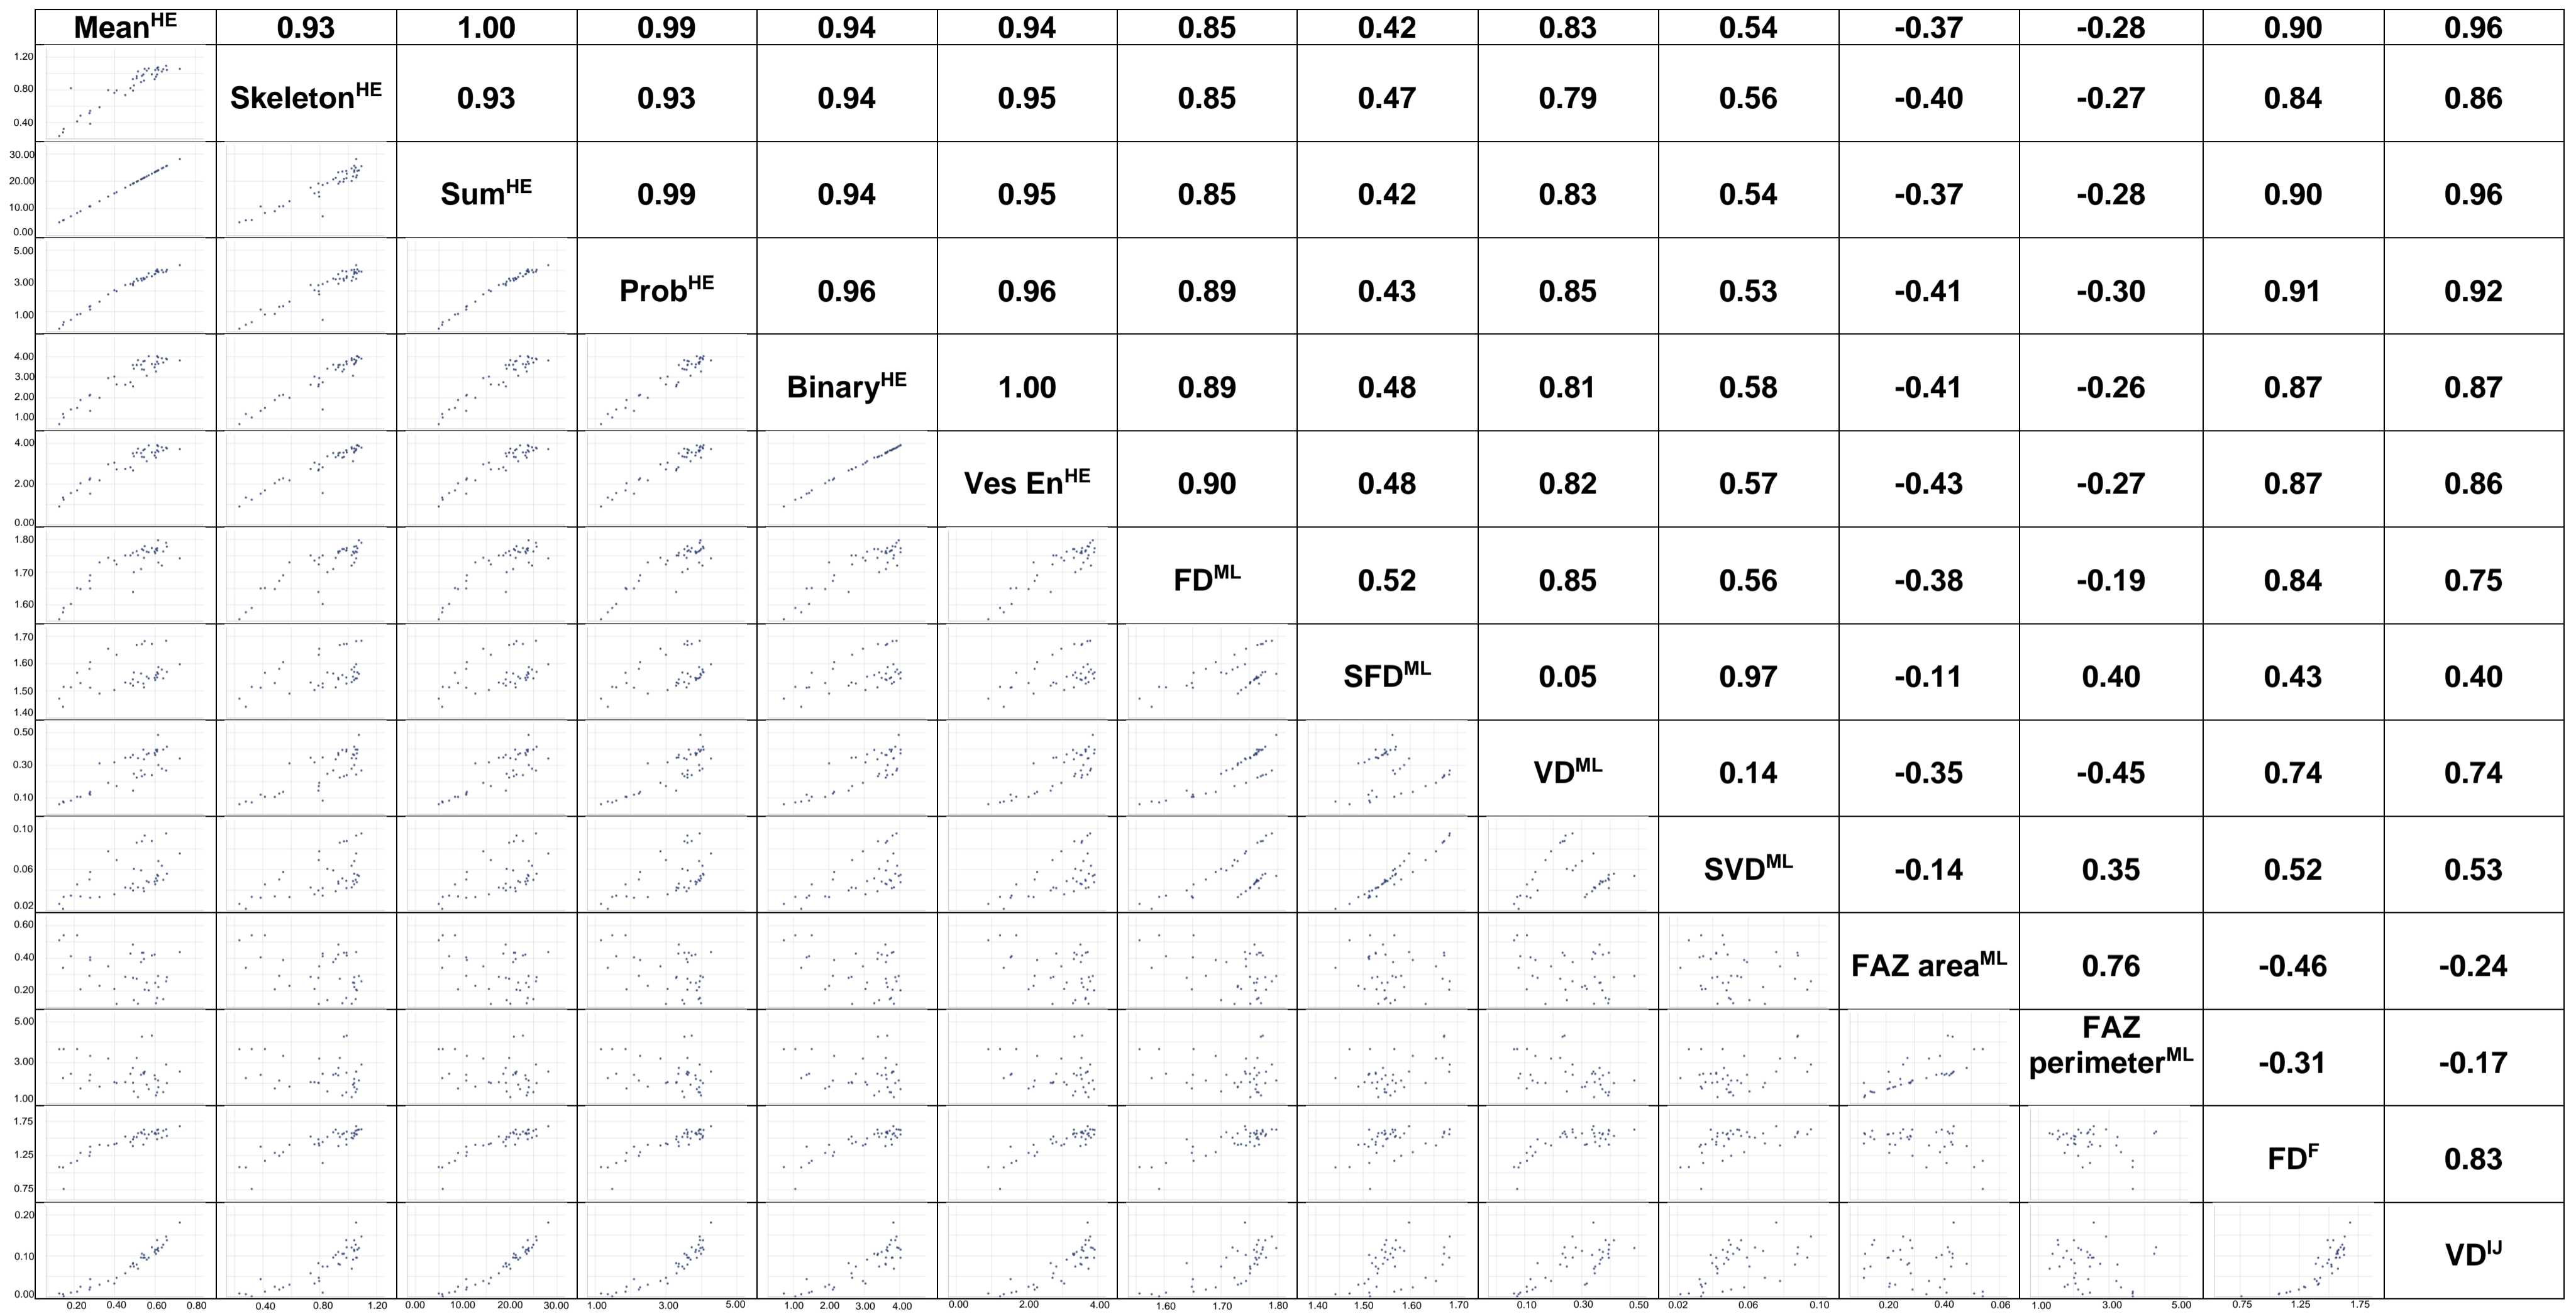

Supplement: tvst-12-7-3_s001.pdf [file tvst-12-7-3_s001.pdf]
